# Supplementary material
Source: publisher figshare collection journal article supplement (https://karger.figshare.com/ndownloader/files/22256631)

**Online supplement 1.** Study duration and distribution of 2,182 recruited participants. The study period was after the maximum point of COVID-19 epidemic in China (**a**). Geographic distribution in China (**b**).COVID-19, the coronavirus disease 2019.


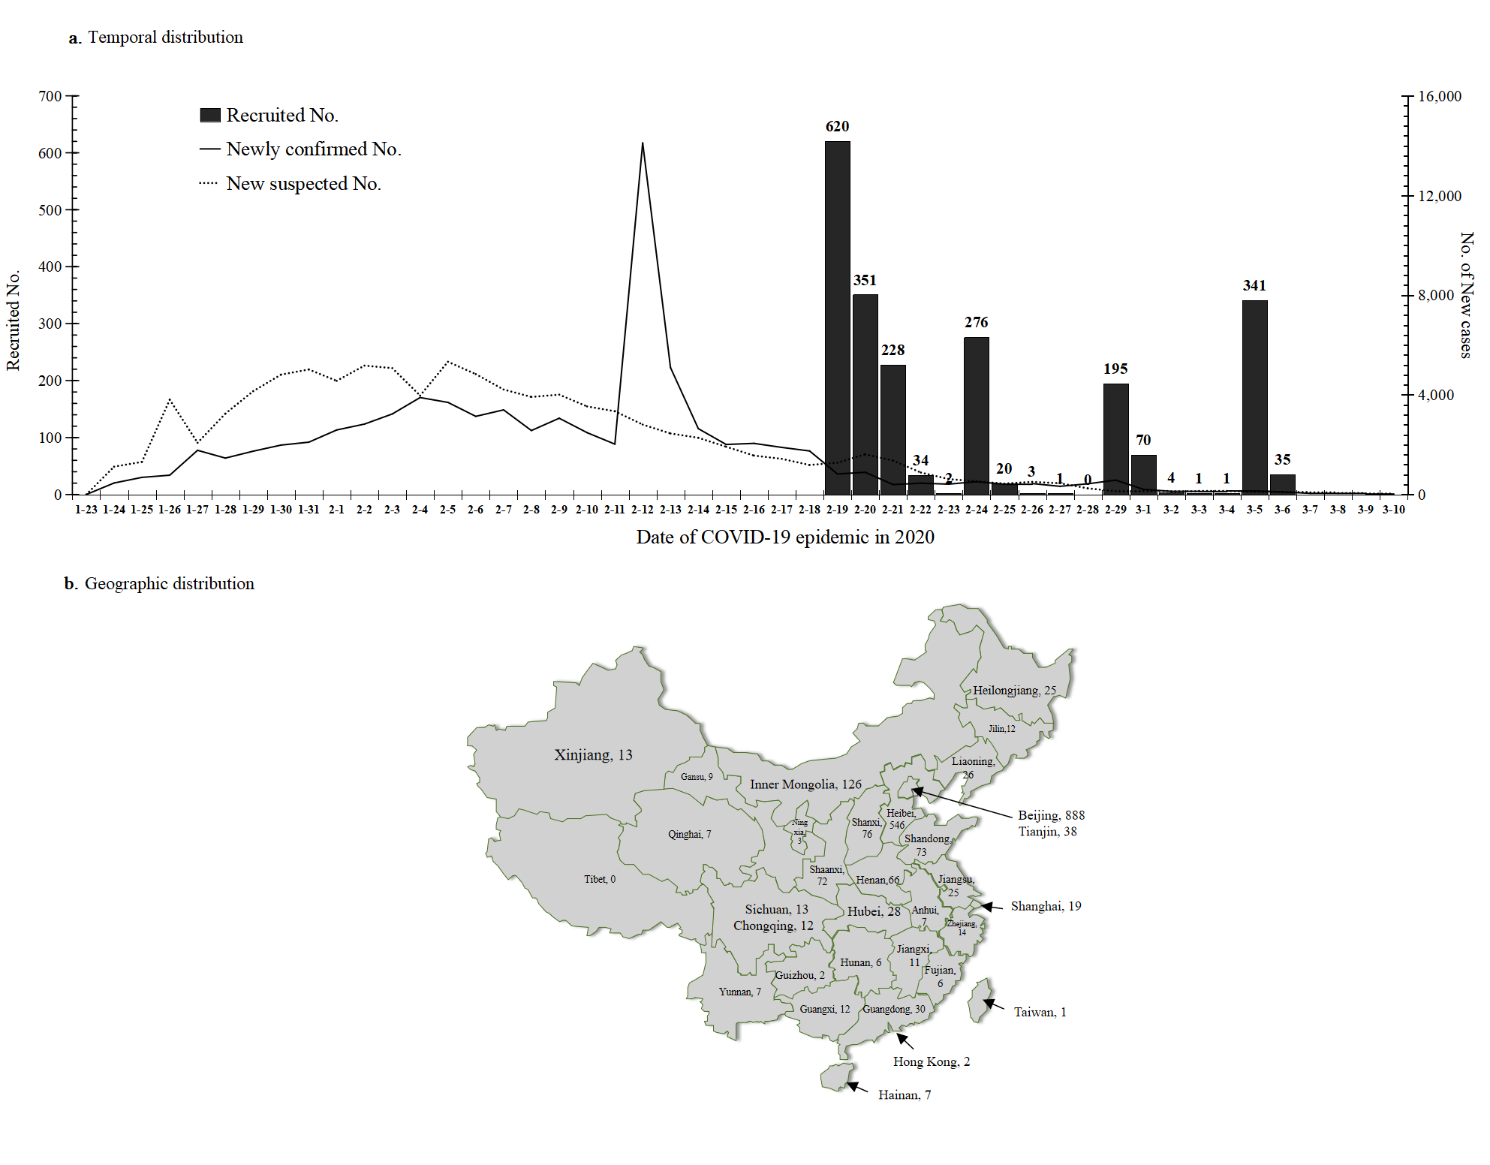

Supplement: Supplementary file 1 [file 22256631]
